# Supplementary material for: Whole-Genome Thermodynamic Analysis Reduces siRNA Off-Target Effects
Source: PLoS One. 2013 Mar 6;8(3):e58326. doi: 10.1371/journal.pone.0058326 (PMC3590146; doi:10.1371/journal.pone.0058326)
Supplement: Table S2 — Formatted Picky output for all siRNAs used in this paper. Picky output is separated into three worksheets: self-designed siRNAs, commercial siRNAs (IDT) and commercial siRNAs (Sigma). Among the listed siRNAs, 11 have predicted off-target genes with thermodynamic scores below 10, and all such off-targets are listed. The other 20 siRNAs have no predicted off-target genes with thermodynamic scores below 10, thus only the off-target gene with the lowest thermodynamic score is listed. The specific meaning of each value in the file is explained at the beginning of the ‘self-design siRNAs’ spreadsheet. (XLSX) [file pone.0058326.s003.xlsx]

## Sheet: self-design siRNAs
Explanation of each data field:
(1) The siRNA input sequence
(2) The length of input sequence
(3) The number of target genes for each siRNA counted by different gene reference numbers
(4) The number of off-target genes predicted for each siRNA counted by different gene reference numbers
(5) The highest melting temperature among the target genes
(6) The highest melting temperature among the nontarget genes
(7) Code explaining the type of identified matches (see Picky documentation for details)
(8) The melting temperature of an identified target or nontarget gene
(9) The start position on siRNA that matches to the target or nontarget gene
(10) The end position on siRNA that mtaches to the target or nontarget gene
(11) The start position on the identified target or nontarget that matches to the siRNA
(12) The end position on the identified target or nontarget that matches to the siRNA
(13) Transcript reference name given to Picky in the source sequence file
(14) Manullay added gene locus name for each transcript
IDH1-G-direct
TTTGTTTCAACTTGAACTCCT(1)		21(2)	6(3)	50(4)	48.35(5)	35.37(6)
RS(7)	48.35(8)	0(9)	20(10)	740(11)	720(12)	ENST00000415282(13)		IDH1(14)
RS	48.35	0	20	652	632	ENST00000415913		IDH1
RS	48.35	0	20	555	535	ENST00000345146		IDH1
RS	48.35	0	20	483	463	ENST00000462386		IDH1
RS	48.35	0	20	476	456	ENST00000446179		IDH1
RS	48.35	0	20	270	250	ENST00000440581		IDH1
R>	35.37	7	20	14	1	ENST00000414419
IDH1-G-design
TCAGCTTACATTATTGCACTT		21	3	22	48.94	32.22
RS	48.94	0	20	2345	2325	ENST00000415913		IDH1
RS	48.94	0	20	2248	2228	ENST00000345146		IDH1
RS	48.94	0	20	2169	2149	ENST00000446179		IDH1
R>	32.22	1	20	2353	2334	ENST00000421388
IDH1-B-direct
TCAATTTCTGAGAAATCACAT		21	3	50	45.37	39.15
RS	45.37	0	20	2411	2391	ENST00000415913		IDH1
RS	45.37	0	20	2314	2294	ENST00000345146		IDH1
RS	45.37	0	20	2235	2215	ENST00000446179		IDH1
R>	39.15	0	20	665	645	ENST00000399066		SYBU
R>	36.88	5	20	1473	1458	ENST00000341893		CEP97
R>	36.88	5	20	762	747	ENST00000465011		CEP97
R>	36.88	5	20	755	740	ENST00000327230		CEP97
R>	36.88	5	20	37	22	ENST00000462076		CEP97
R>	36.88	5	20	743	728	ENST00000494050		CEP97
R>	36.88	5	20	703	688	ENST00000489172		CEP97
R>	36.88	5	20	346	331	ENST00000467655		CEP97
R>	32.61	4	18	2067	2053	ENST00000524388
IDH1-B-design-2
TTGCTCTGTGGGCTAACCCTC		21	4	50	58.97	52.34
RS	58.97	0	20	494	474	ENST00000484575		IDH1
RS	58.97	0	20	1414	1394	ENST00000415913		IDH1
RS	58.97	0	20	1317	1297	ENST00000345146		IDH1
RS	58.97	0	20	1238	1218	ENST00000446179		IDH1
R>	52.34	2	20	3137	3119	ENST00000342528		OTOG
R>	52.34	2	20	5804	5786	ENST00000399397		OTOG
R>	52.34	2	20	5835	5817	ENST00000399391		OTOG
R>	47.27	2	19	2404	2387	ENST00000359866
IDH1-B-design-3
TACTGCTTGTCATATATCTCC		21	4	50	47.43	40.49
RS	47.43	0	20	1085	1065	ENST00000415913		IDH1
RS	47.43	0	20	988	968	ENST00000345146		IDH1
RS	47.43	0	20	909	889	ENST00000446179		IDH1
RS	47.43	0	20	699	679	ENST00000440581		IDH1
R>	40.49	1	18	1823	1806	ENST00000395161		MAPK10
R>	40.49	1	18	1664	1647	ENST00000359221		MAPK10
R>	40.49	1	18	1359	1342	ENST00000361569		MAPK10
R>	40.49	1	18	1376	1359	ENST00000449047		MAPK10
R>	40.49	1	18	1744	1727	ENST00000395169		MAPK10
R>	40.49	1	18	2075	2058	ENST00000395166		MAPK10
R>	40.49	1	18	1469	1452	ENST00000310816		MAPK10
R>	40.49	1	18	874	857	ENST00000515400		MAPK10
R>	40.49	1	18	1143	1126	ENST00000395160		MAPK10
R>	40.49	1	18	1089	1072	ENST00000508262		MAPK10
R>	40.49	1	18	820	803	ENST00000395157		MAPK10
R>	34.19	1	20	345	326	ENST00000408034
ITPR2-G-direct
TAAAGTATCGATTCAGAAGTA		21	3	100	44.2	27.87
RS	44.2	0	20	339	319	ENST00000543958		ITPR2
RU	44.2	0	20	5529	5509	ENST00000381340		ITPR2
RS	44.2	0	20	24	4	ENST00000540429		ITPR2
R>	27.87	1	17	2480	2464	ENST00000264968
ITPR2-G-design
TTTACTTCCTTGTTCATCCCT		21	2	100	49.72	38.55
RS	49.72	0	20	1403	1383	ENST00000451599		ITPR2
RU	49.72	0	20	6992	6972	ENST00000381340		ITPR2
R>	38.55	7	20	1100	1087	ENST00000253048
ITPR2-B-direct
TTATTCTTCCTTTGTTCTGTC		21	1	100	45.99	40.55
RU	45.99	0	20	8458	8438	ENST00000381340		ITPR2
R>	40.55	3	19	1602	1586	ENST00000533902		N/A
R>	40.55	3	19	1853	1837	ENST00000532234		N/A
R>	40.45	5	20	2244	2229	ENST00000544951		ITPR1
R>	40.45	5	20	8162	8147	ENST00000443694		ITPR1
R>	40.45	5	20	8512	8497	ENST00000302640		ITPR1
R>	40.45	5	20	1485	1470	ENST00000493491		ITPR1
R>	40.45	5	20	8557	8542	ENST00000356617		ITPR1
R>	40.45	5	20	8413	8398	ENST00000423119		ITPR1
R>	40.45	5	20	8411	8396	ENST00000357086		ITPR1
R>	40.45	5	20	8366	8351	ENST00000456211		ITPR1
R>	40.45	5	20	1509	1494	ENST00000463980		ITPR1
R>	40.45	5	20	8512	8497	ENST00000354582		ITPR1
R>	40.45	5	20	8526	8511	ENST00000426160		ITPR1
R>	37.34	1	19	1031	1013	ENST00000356828		UHRF1BP1L
R>	37.34	1	19	1032	1014	ENST00000279907		UHRF1BP1L
R>	36.23	0	20	1964	1944	ENST00000328457		PLCXD3
R>	36.07	5	19	19973	19959	ENST00000370754		DST
R>	36.07	5	19	3839	3825	ENST00000340834		DST
R>	36.07	5	19	19380	19366	ENST00000312431		DST
R>	36.07	5	19	12405	12391	ENST00000244364		DST
R>	36.07	5	19	13368	13354	ENST00000370788		DST
R>	36.07	5	19	13175	13161	ENST00000421834		DST
R>	36.07	5	19	19114	19100	ENST00000361203		DST
R>	36.07	5	19	19439	19425	ENST00000370769		DST
R>	36.07	5	19	18569	18555	ENST00000446842		DST
R>	35.14	2	20	423	405	ENST00000519996
ITPR2-B-design
TTCTTCATCATCAATGTCATC		21	1	100	46.28	42.87
RU	46.28	0	20	2492	2472	ENST00000381340		ITPR2
R>	42.87	1	20	173	154	ENST00000375415		ARHGEF10L
R>	42.87	1	20	289	270	ENST00000452522		ARHGEF10L
R>	42.87	1	20	289	270	ENST00000361221		ARHGEF10L
R>	42.87	1	20	289	270	ENST00000434513		ARHGEF10L
R>	39.67	1	20	486	467	ENST00000526858		TTYH2
R>	39.67	1	20	1259	1240	ENST00000529107		TTYH2
R>	39.67	1	20	437	418	ENST00000528152		TTYH2
R>	39.67	1	20	1365	1346	ENST00000269346		TTYH2
R>	39.67	1	20	1540	1521	ENST00000441391		TTYH2
R>	39.43	1	20	846	827	ENST00000263228		UBE2R2
R>	39.33	0	18	6152	6134	ENST00000367478		TPR
R>	38.39	0	20	5157	5137	ENST00000535236		SFSWAP
R>	38.39	0	20	1916	1896	ENST00000541286		SFSWAP
R>	38.39	0	20	1964	1944	ENST00000261674		SFSWAP
R>	38.39	0	20	1916	1896	ENST00000538548		SFSWAP
R>	37.84	1	18	1501	1484	ENST00000427946		NCAPH
R>	37.84	1	18	1982	1965	ENST00000455200		NCAPH
R>	37.84	1	18	1763	1746	ENST00000240423		NCAPH
R>	37.84	1	18	1716	1699	ENST00000435975		NCAPH
R>	37.32	5	20	1598	1583	ENST00000433674		CAPN2
R>	37.32	5	20	1685	1670	ENST00000366869		CAPN2
R>	37.32	5	20	237	222	ENST00000492565		CAPN2
R>	37.32	5	20	1323	1308	ENST00000487223		CAPN2
R>	37.32	5	20	1925	1910	ENST00000474026		CAPN2
R>	37.32	5	20	1905	1890	ENST00000295006		CAPN2
R>	36.85	0	20	533	513	ENST00000399556		N/A
R>	36.54	1	20	1651	1632	ENST00000544198		BNC2
R>	36.54	1	20	2109	2090	ENST00000540340		BNC2
R>	36.54	1	20	2102	2083	ENST00000456672		BNC2
R>	36.54	1	20	1840	1821	ENST00000418777		BNC2
R>	36.54	1	20	1880	1861	ENST00000380667		BNC2
R>	36.54	1	20	1684	1665	ENST00000545497		BNC2
R>	36.54	1	20	2027	2008	ENST00000380672		BNC2
R>	36.54	1	20	2081	2062	ENST00000484726		BNC2
R>	36.54	1	20	2075	2056	ENST00000436939		BNC2
R>	36.54	1	20	148	129	ENST00000411752		BNC2
R>	36.54	1	20	2109	2090	ENST00000380666		BNC2
R>	36.17	4	20	2289	2273	ENST00000367843
TRIM28-G-direct
AGTTAACTTGTTGAATTGCTT		21	2	50	47.73	35.31
RS	47.73	0	20	2616	2596	ENST00000253024		TRIM28
RS	47.73	0	20	2370	2350	ENST00000341753		TRIM28
R>	35.31	4	20	3192	3176	ENST00000311946
TRIM28-G-design
TTGTCCTCAGTTAACTTGTTG		21	2	50	48.85	36.39
RU	48.85	0	20	2624	2604	ENST00000253024		TRIM28
RS	48.85	0	20	2378	2358	ENST00000341753		TRIM28
R>	36.39	0	17	793	776	ENST00000519695
TRIM28-B-design-1
TAAGGTTGTAGTCCTCAGTGG		21	2	50	52.15	46.67
RU	52.15	0	20	1846	1826	ENST00000253024		TRIM28
RS	52.15	0	20	1600	1580	ENST00000341753		TRIM28
R>	46.67	3	20	1481	1464	ENST00000219070		MMP2
R>	46.67	3	20	1136	1119	ENST00000437642		MMP2
R>	46.67	3	20	884	867	ENST00000543485		MMP2
R>	39.75	1	19	11632	11614	ENST00000426654
TRIM28-B-design-2
TAGCCTTCCTGCACCTCCATG		21	2	50	57.29	51.39
RU	57.29	0	20	1634	1614	ENST00000253024		TRIM28
RS	57.29	0	20	1388	1368	ENST00000341753		TRIM28
R>	51.39	1	20	3496	3477	ENST00000252134		MICAL3
R>	51.39	1	20	6904	6885	ENST00000441493		MICAL3
R>	51.39	1	20	1790	1771	ENST00000476405		MICAL3
R>	49.89	1	17	357	341	ENST00000483402		DNAJC6
R>	49.89	1	17	469	453	ENST00000371069		DNAJC6
R>	49.89	1	17	273	257	ENST00000463018		DNAJC6
R>	49.89	1	17	380	364	ENST00000263441		DNAJC6
R>	49.89	1	17	263	247	ENST00000494710		DNAJC6
R>	49.89	1	17	254	238	ENST00000395325		DNAJC6
R>	48.33	3	20	293	276	ENST00000533545		N/A
R>	48.33	3	20	1225	1208	ENST00000529346		N/A
R>	47.71	2	20	157	139	ENST00000389005		C17orf85
R>	47.71	2	20	157	139	ENST00000158149		C17orf85
R>	47.19	6	20	1270	1256	ENST00000356613

## Sheet: commercial siRNAs (IDT)
IDH1-1 (IDT)
TTCGTGTCATTTCATCTCCTT		21	8	2	49.99	40.81
RS	49.99	0	20	530	510	ENST00000415282		IDH1
RS	49.99	0	20	442	422	ENST00000415913		IDH1
RS	49.99	0	20	345	325	ENST00000345146		IDH1
RS	49.99	0	20	325	305	ENST00000481557		IDH1
RS	49.99	0	20	541	521	ENST00000417583		IDH1
RS	49.99	0	20	437	417	ENST00000451391		IDH1
RS	49.99	0	20	273	253	ENST00000462386		IDH1
RS	49.99	0	20	266	246	ENST00000446179		IDH1
R>	40.81	0	20	60	40	ENST00000440581		N/A
R>	35.05	5	19	39	25	ENST00000491498
IDH1-2 (IDT)
TTATCAAGCTTTGCTCTGTGG		21	4	36	51.86	45.93
RS	51.86	0	20	504	484	ENST00000484575		IDH1
RS	51.86	0	20	1424	1404	ENST00000415913		IDH1
RS	51.86	0	20	1327	1307	ENST00000345146		IDH1
RS	51.86	0	20	1248	1228	ENST00000446179		IDH1
R>	45.93	3	20	229	212	ENST00000519172		N/A
R>	40.19	4	20	126	110	ENST00000555424
IDH1-3 (IDT)
TTATCCTTCTTAGCTCAGGTA		21	4	9	47.6	37.23
RS	47.6	0	20	732	712	ENST00000484575		IDH1
RS	47.6	0	20	1652	1632	ENST00000415913		IDH1
RS	47.6	0	20	1555	1535	ENST00000345146		IDH1
RS	47.6	0	20	1476	1456	ENST00000446179		IDH1
R>	37.23	3	19	1230	1214	ENST00000440572
ITPR2-1 (IDT)
TTGTCATATATTGGAATCGTG		21	2	1	46.93	28.89
S	46.93	0	20	612	632	fake		ITPR2
S	46.47	0	20	740	760	fake		ITPR2
R>	28.89	9	20	2750	2739	ENST00000536628
ITPR2-2 (IDT)
TTGCTTGTAGTTATCTACGTC		21	2	3	48.75	38.14
RU	48.75	0	20	3749	3729	ENST00000381340		ITPR2
RS	48.75	0	20	510	490	ENST00000545902		ITPR2
R>	38.14	1	19	859	841	ENST00000460926
ITPR2-3 (IDT)
ATCTTATTCTTGCATCGCTTC		21	1	3	50.27	37.51
RU	50.27	0	20	5361	5341	ENST00000381340		ITPR2
R>	37.51	5	18	7523	7510	ENST00000288050
TRIM28-1 (IDT)
GTATGGTCCTTGGTGTACTTC		21	1	28	52.02	44.06
RU	52.02	0	20	860	840	ENST00000253024		TRIM28
R>	44.06	3	20	286	269	ENST00000462146		PDZRN3
R>	44.06	3	20	276	259	ENST00000477434		PDZRN3
R>	44.06	3	20	1141	1124	ENST00000263666		PDZRN3
R>	44.06	3	20	347	330	ENST00000498048		PDZRN3
R>	44.06	3	20	419	402	ENST00000492909		PDZRN3
R>	44.06	3	20	276	259	ENST00000466780		PDZRN3
R>	44.06	3	20	374	357	ENST00000479530		PDZRN3
R>	44.06	3	20	286	269	ENST00000535920		PDZRN3
R>	44.06	3	20	1124	1107	ENST00000416926		PDZRN3
R>	39.99	4	20	609	593	ENST00000397286
TRIM28-2 (IDT)
AACAATAAGGTTGTAGTCCTC		21	2	5	49.04	35.59
RU	49.04	0	20	1851	1831	ENST00000253024		TRIM28
RS	49.04	0	20	1605	1585	ENST00000341753		TRIM28
R>	35.59	0	20	4677	4657	ENST00000261438
TRIM28-3 (IDT)
TTGTCCTCAGTTAACTTGTTG		21	2	13	48.85	36.39
RU	48.85	0	20	2624	2604	ENST00000253024		TRIM28
RS	48.85	0	20	2378	2358	ENST00000341753		TRIM28
R>	36.39	0	17	793	776	ENST00000519695

## Sheet: commercial siRNAs (Sigma)
IDH1-1 (Sigma)
TGGTACATGCGGTAGTGAC		19	4	12	51.56	39.76
RS	51.56	0	18	420	402	ENST00000484575		IDH1
RS	51.56	0	18	1340	1322	ENST00000415913		IDH1
RS	51.56	0	18	1243	1225	ENST00000345146		IDH1
RS	51.56	0	18	1164	1146	ENST00000446179		IDH1
R>	39.76	0	18	954	936	ENST00000440581
IDH1-2 (Sigma)
TGACTTATCTTGATTATAC		19	4	19	38.36	27.84
RS	38.36	0	18	945	927	ENST00000415913		IDH1
RS	38.36	0	18	848	830	ENST00000345146		IDH1
RS	38.36	0	18	769	751	ENST00000446179		IDH1
RS	38.36	0	18	563	545	ENST00000440581		IDH1
R>	27.84	2	18	295	279	ENST00000468436		N/A
R>	25.8	1	14	257	244	ENST00000522954
IDH1-3 (Sigma)
AAGGCCAACCCTTAGACAG		19	3	1	53.94	38.19
RS	53.94	0	18	1000	982	ENST00000415913		IDH1
RS	53.94	0	18	903	885	ENST00000345146		IDH1
RS	53.94	0	18	824	806	ENST00000446179		IDH1
R>	38.19	1	18	2215	2199	ENST00000471595
ITPR2-1 (Sigma)
TATCAATCCCATTAGACTC		19	2	7	42.49	33.17
RS	42.49	0	18	876	858	ENST00000451599		ITPR2
RS	42.49	0	18	6465	6447	ENST00000381340		ITPR2
R>	33.17	2	18	1577	1561	ENST00000308683		ZNF622
R>	31.01	3	18	976	961	ENST00000381342
ITPR2-2 (Sigma)
TTGCGGGACTCATTGTTAC		19	2	32	50.26	38.67
RS	50.26	0	18	570	552	ENST00000451599		ITPR2
RS	50.26	0	18	6159	6141	ENST00000381340		ITPR2
R>	38.67	0	12	1128	1116	ENST00000374660
ITPR2-3 (Sigma)
TCTCGAGTGAGGTATTCAC		19	2	1	49.18	32.34
RS	49.18	0	18	1351	1333	ENST00000451599		ITPR2
RS	49.18	0	18	6940	6922	ENST00000381340		ITPR2
R>	32.34	1	12	73	62	ENST00000371817
TRIM28-1 (Sigma)
TTGGCTGGCCCAGTAGAGC		19	1	40	57.24	49.45
RU	57.24	0	18	884	866	ENST00000253024		TRIM28
R>	49.45	1	18	163	146	ENST00000531161		EXT2
R>	49.45	1	18	1115	1098	ENST00000343631		EXT2
R>	49.45	1	18	1141	1124	ENST00000395673		EXT2
R>	49.45	1	18	1320	1303	ENST00000533608		EXT2
R>	49.45	1	18	1152	1135	ENST00000358681		EXT2
R>	48.31	3	18	360	345	ENST00000447515		GGA1
R>	48.31	3	18	519	504	ENST00000406772		GGA1
R>	48.31	3	18	297	282	ENST00000431745		GGA1
R>	48.31	3	18	473	458	ENST00000414350		GGA1
R>	48.31	3	18	407	392	ENST00000484804		GGA1
R>	48.31	3	18	102	87	ENST00000325180		GGA1
R>	48.31	3	18	256	241	ENST00000439161		GGA1
R>	48.31	3	18	108	93	ENST00000429218		GGA1
R>	48.31	3	18	222	207	ENST00000381756		GGA1
R>	48.31	3	18	117	102	ENST00000489772		GGA1
R>	48.31	3	18	113	98	ENST00000405147		GGA1
R>	48.31	3	18	472	457	ENST00000343632		GGA1
R>	48.31	3	18	294	279	ENST00000453208		GGA1
R>	48.31	3	18	100	85	ENST00000423024		GGA1
R>	48.31	3	18	101	86	ENST00000337437		GGA1
R>	48.31	3	18	106	91	ENST00000413251		GGA1
R>	48.31	3	18	250	235	ENST00000449944		GGA1
R>	48.31	3	18	406	391	ENST00000411501		GGA1
R>	48.31	3	18	699	684	ENST00000326597		GGA1
R>	48.07	4	18	635	621	ENST00000452602		N/A
R>	48.07	4	18	296	282	ENST00000434779		N/A
R>	48.07	4	18	466	452	ENST00000417624		N/A
R>	46.87	2	18	1405	1389	ENST00000359518
TRIM28-2 (Sigma)
TAAGCACAGGTTTGGTCTC		19	2	40	49.43	46.92
RU	49.43	0	18	2023	2005	ENST00000253024		TRIM28
RS	49.43	0	18	1777	1759	ENST00000341753		TRIM28
R>	46.92	1	18	5579	5562	ENST00000237536		SOGA1
R>	42.08	4	18	35	21	ENST00000545599		TSPAN7
R>	42.08	4	18	209	195	ENST00000378482		TSPAN7
R>	42.08	4	18	35	21	ENST00000480976		TSPAN7
R>	42.08	4	18	35	21	ENST00000286824		TSPAN7
R>	42.08	4	18	35	21	ENST00000475216		TSPAN7
R>	42.08	4	18	37	23	ENST00000422612		TSPAN7
R>	42.08	4	18	37	23	ENST00000471410		TSPAN7
R>	41.16	2	17	2331	2316	ENST00000420737		PDE4DIP
R>	41.16	2	17	8282	8267	ENST00000369359		PDE4DIP
R>	41.16	2	17	7910	7895	ENST00000313382		PDE4DIP
R>	41.16	2	17	8324	8309	ENST00000369353		PDE4DIP
R>	41.16	2	17	5269	5254	ENST00000524974		PDE4DIP
R>	41.16	2	17	8129	8114	ENST00000530740		PDE4DIP
R>	41.16	2	17	8070	8055	ENST00000369356		PDE4DIP
R>	41.16	2	17	8025	8010	ENST00000369354		PDE4DIP
R>	40.32	2	17	4448	4433	ENST00000333646		MED12
R>	40.32	2	17	4309	4294	ENST00000374102		MED12
R>	40.32	2	17	4153	4138	ENST00000430072		MED12
R>	40.32	2	17	484	469	ENST00000439750		MED12
R>	40.32	2	17	4281	4266	ENST00000374080		MED12
R>	40.32	2	17	4448	4433	ENST00000536756		MED12
R>	39.42	2	18	727	711	ENST00000336431
TRIM28-3 (Sigma)
ACTGGTTGCACATAACCAG		19	2	8	51.83	44.79
RU	51.83	0	18	2215	2197	ENST00000253024		TRIM28
RS	51.83	0	18	1969	1951	ENST00000341753		TRIM28
R>	44.79	0	18	1363	1345	ENST00000389050		N/A
R>	40.33	2	16	597	583	ENST00000419408
